# Supplementary material
Source: Royal Society of Chemistry journal article supplement (doi:10.1039/d6qi00748a)
Supplement: d6qi00748a1.pdf [file d6qi00748a1.pdf]

## Supporting Information

### Magnetic Field-Induced Porous Carbon Aerogel Supported CoFe Nanowires for Electromagnetic Wave Absorption

Yucong Lei <sup>a</sup>, Qinchuan He <sup>a, b, \*</sup>, Yiqun Wang <sup>a, \*</sup>, Congmin Fan <sup>a</sup>, Xuemin Yin <sup>c, d</sup>.

<sup>a</sup> *College of Materials and Chemistry & Chemical Engineering, Chengdu University of Technology, Chengdu, 610059, China*

<sup>b</sup> *State Key Laboratory of Geohazard Prevention and Geoenvironment Protection, Chengdu University of Technology, Chengdu, 610059, China*

<sup>c</sup> *School of Materials Science and Engineering, Northwestern Polytechnical University, Xi'an, 710072, China*

<sup>d</sup> *Department of Aeronautical and Aviation Engineering, The Hong Kong Polytechnic University, Hung Hom, Kowloon, Hong Kong, 999077, China*

\*Corresponding author: E-mail addresses: heqinchuan@cdut.edu.cn (Q.C. He)  
wangyiqun17@cdut.edu.cn (Y.Q. Wang)

#### Supporting Information Table of Contents

|                                          |            |
|------------------------------------------|------------|
| Supplementary Figures (Fig. S1–S9) ..... | Page 2-8   |
| Supplementary Formula (S1-S6) .....      | Page 9     |
| Supplementary Table (Table S1-S2) .....  | Page 10-11 |
| Supplementary References .....           | Page 12-13 |

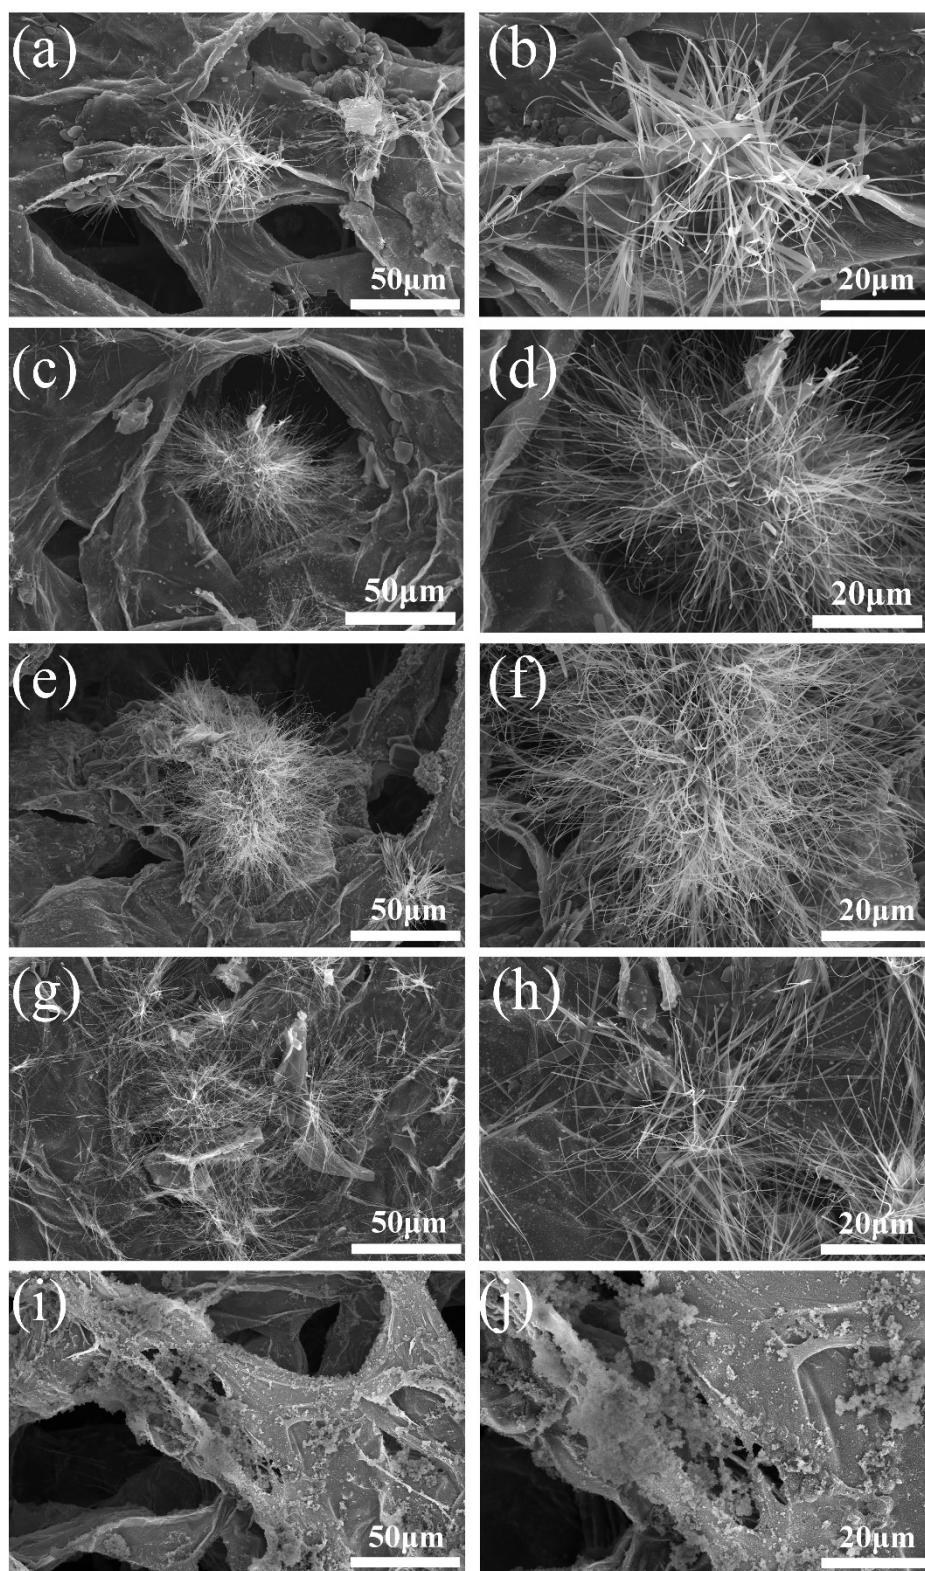

**Fig. S1.** SEM images of S-1(a-b), S-2(c-d), S-3(e-f), S-4(g-h) and S-5(i-j).

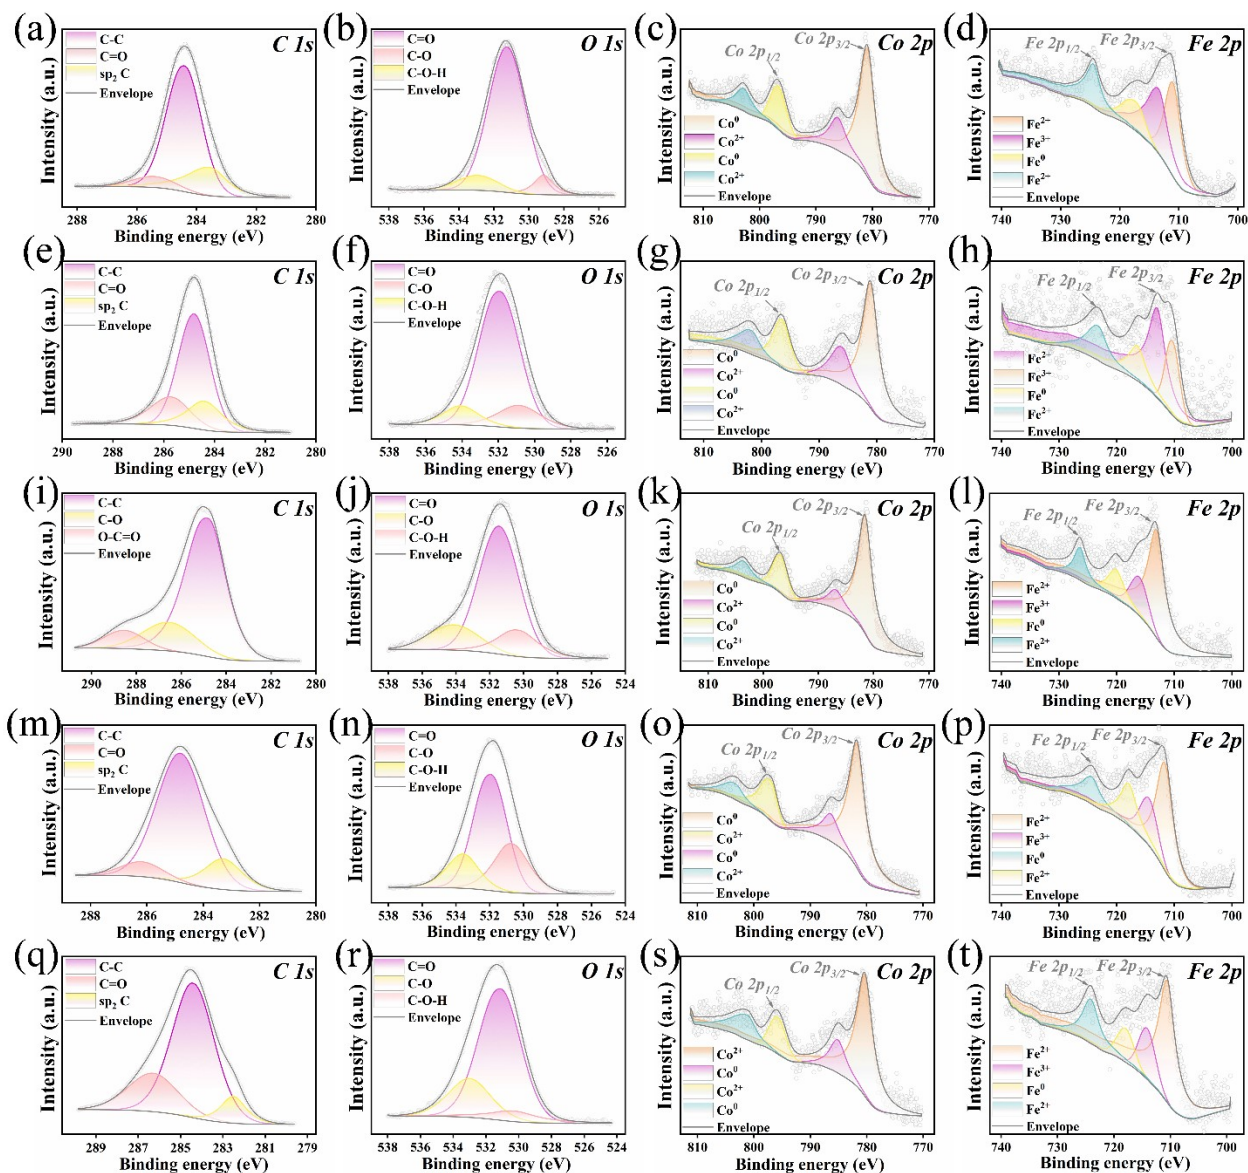

**Fig. S2.** XPS characteristic peaks of S-1(a-d), S-2(e-h), S-3(i-l), S-4(m-p) and S-5(q-t).

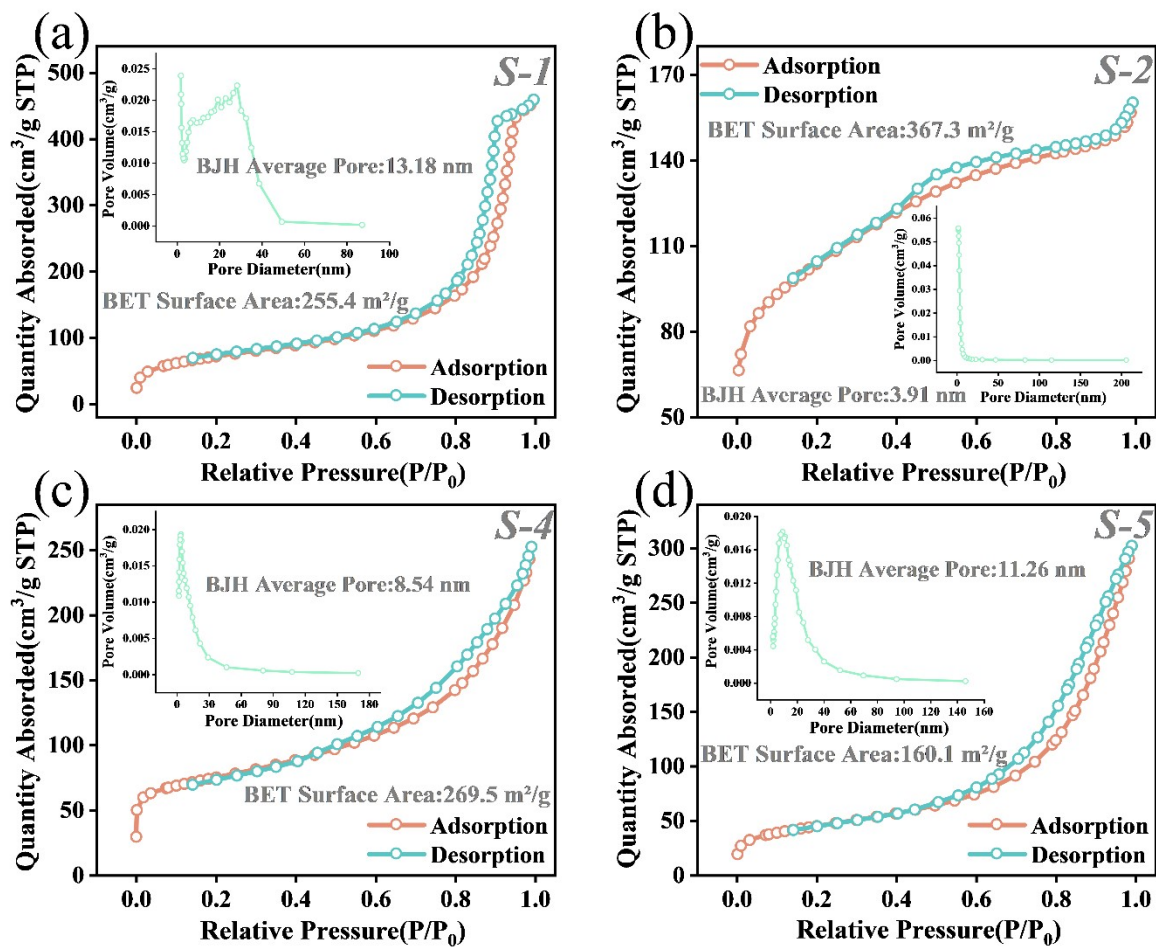

**Fig. S3.**  $N_2$  absorption-desorption isotherms and polar size distributions for S-1 (a), S-2 (b), S-4(c) and S-5 (c).

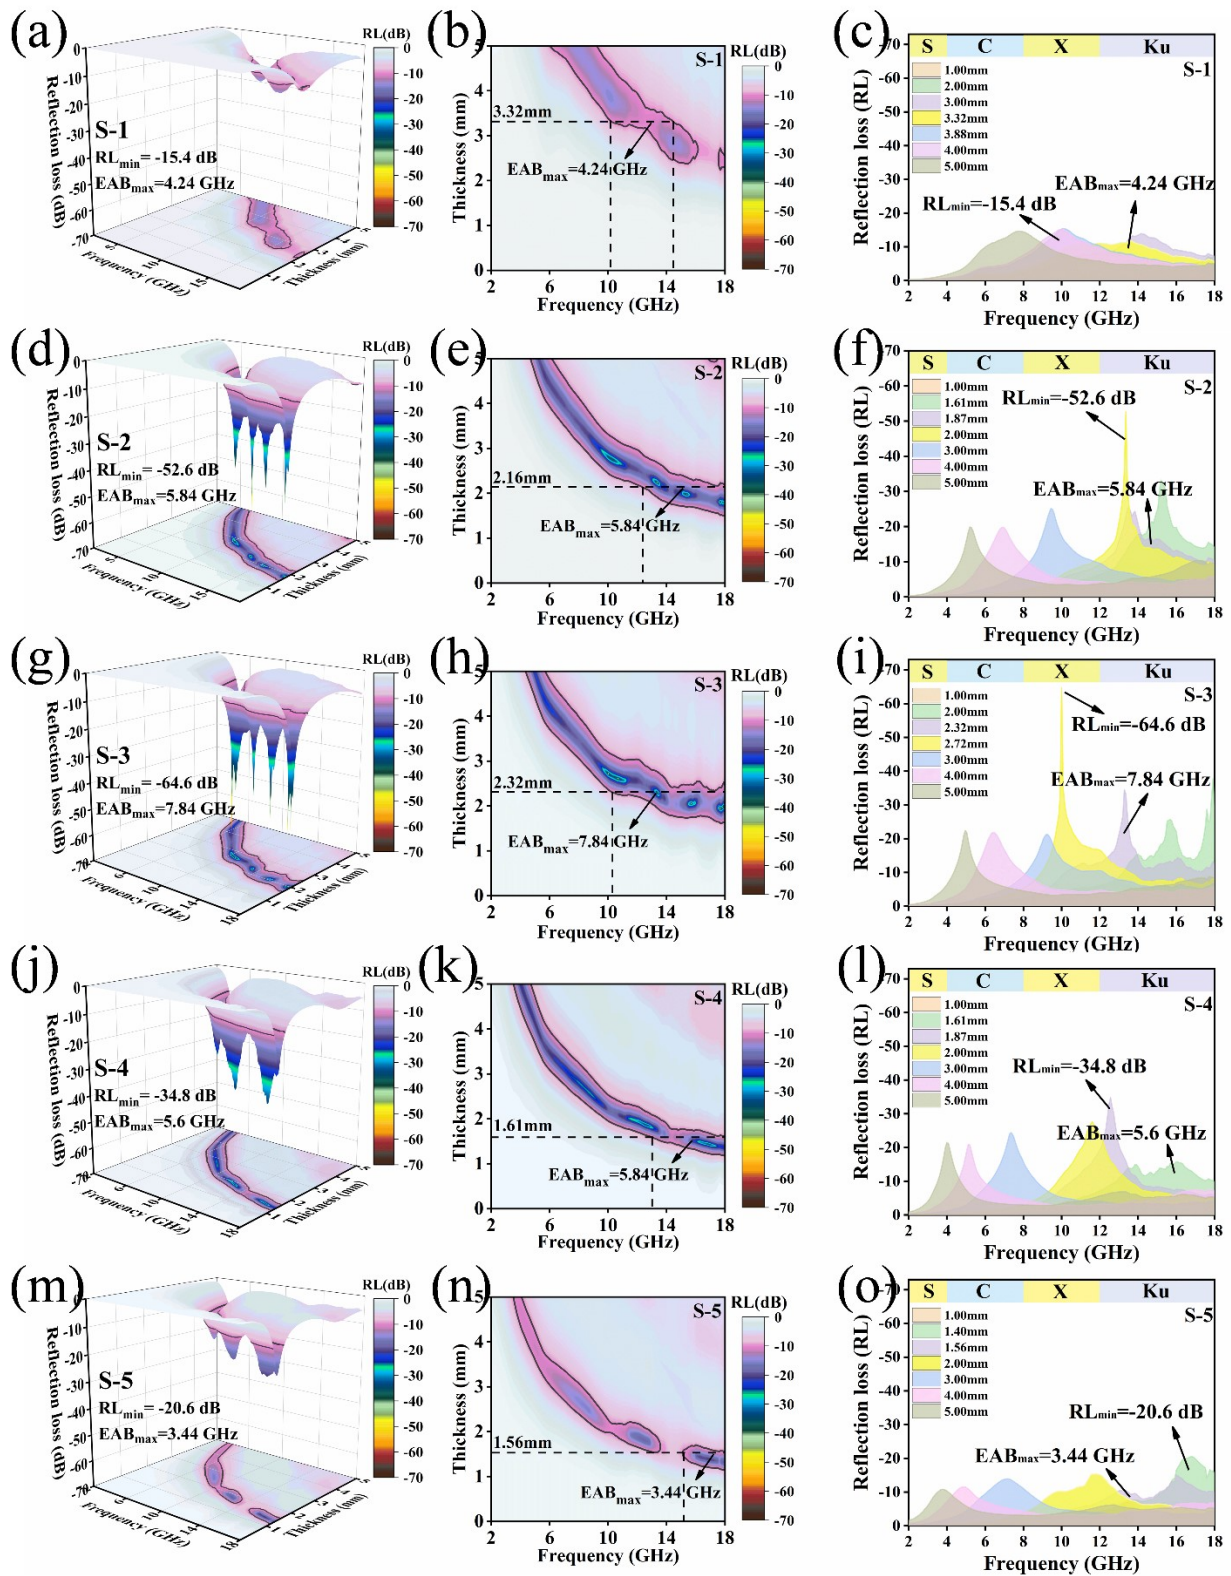

Fig. S4. Reflection loss 3D, 2D and 1D diagrams for CoFe NWs/CAP composites.

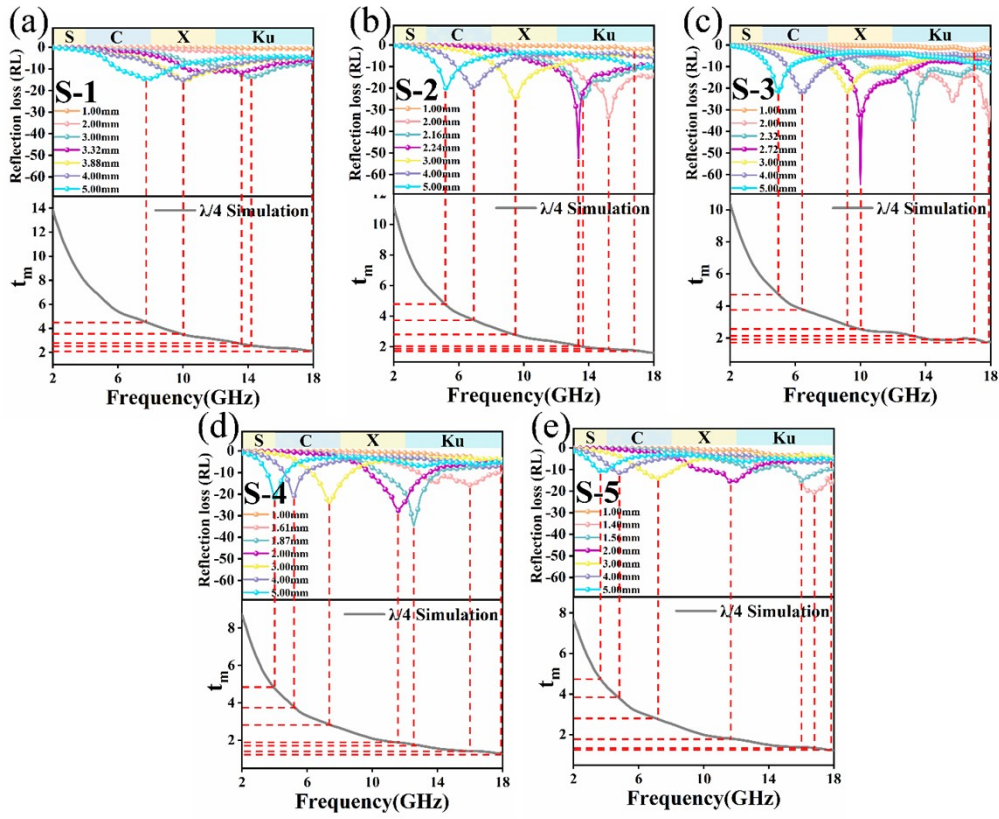

**Fig. S5.** Theoretical study on  $\lambda/4$  waveguide properties and corresponding reflection loss of CoFe NWs/CAP composites.

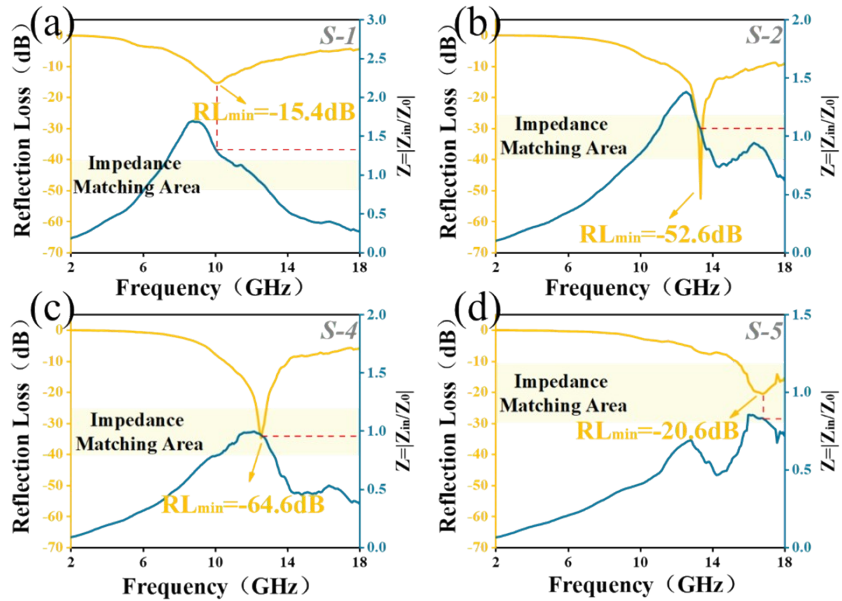

**Fig. S6.** Correspondence between RL and impedance matching of S-1(a), S-2(b), S-4(c) and S-5(d).

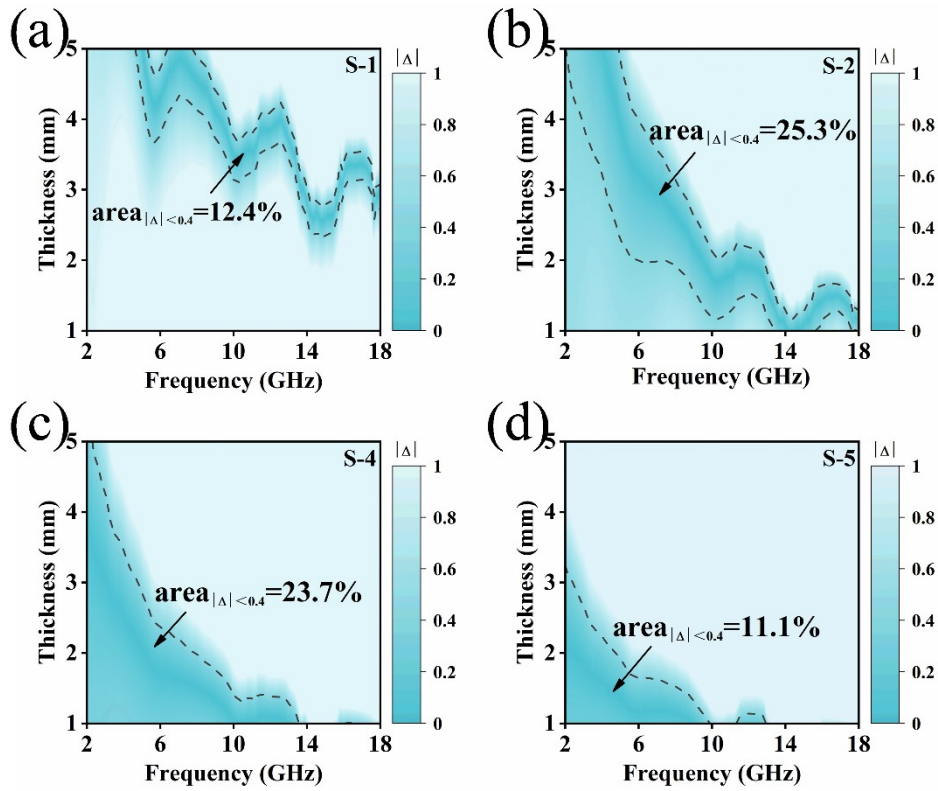

**Fig. S7.** Impedance matching of S-1(a), S-2(b), S-4(c) and S-5(d).

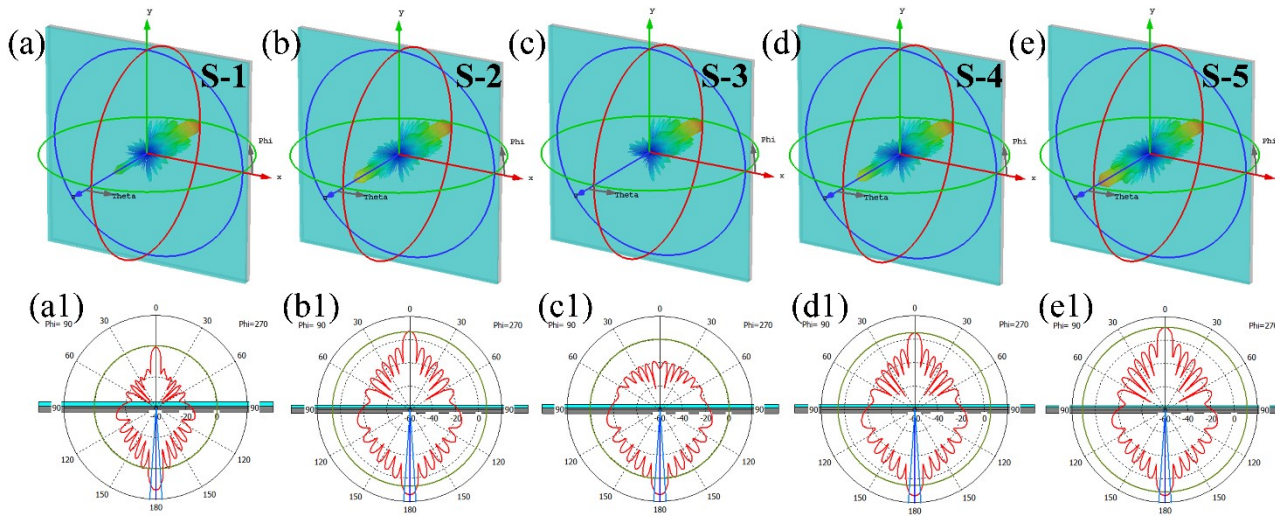

**Fig. S8.** RCS 3D and 2D plots for S-1 (a, a1), S-2 (b, b1), S-3 (c, c1), S-4 (d, d1) and

S-5(e, e1).

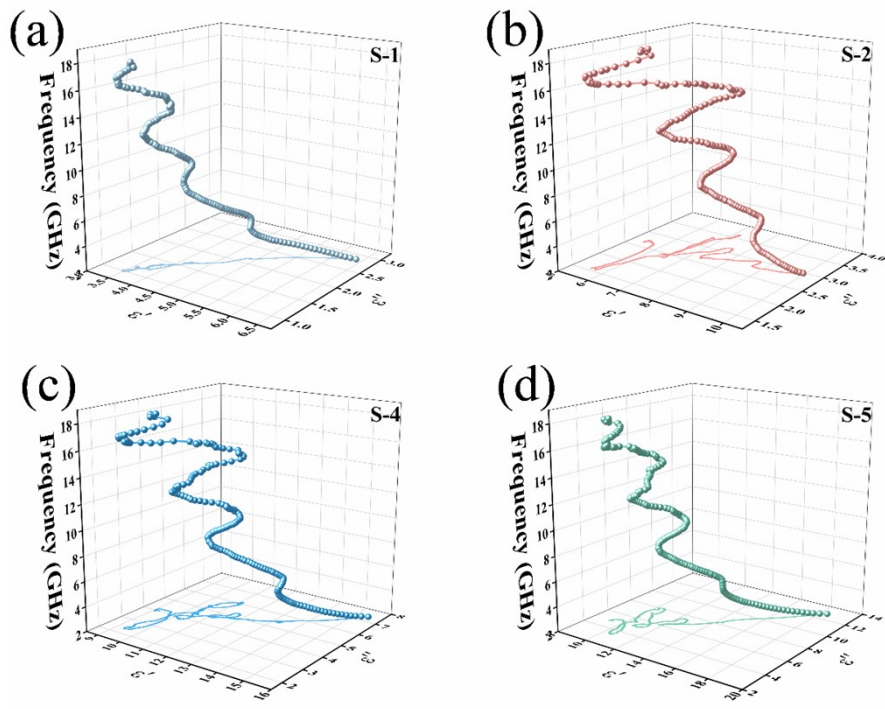

**Fig. S9.** Cole-Cole curve of S-1(a), S-2(b), S-4(c) and S-5(d).

To dissect the loss processes in composites, the variation characteristics of the material's relative complex dielectric constant ( $\epsilon_r = \epsilon' - j\epsilon''$ ) and complex magnetic permeability ( $\mu_r = \mu' - j\mu''$ ) were analyzed. Among these,  $\epsilon'$ ,  $\epsilon''$ ,  $\mu'$  and  $\mu''$  represent the storage and dissipation of electrical and magnetic energy, respectively. The definitions of  $\epsilon_r$ ,  $\epsilon'$ ,  $\epsilon''$ ,  $\mu'$ ,  $\mu''$  and  $\tan\delta_\epsilon$  are as follows :<sup>1-3</sup>

$$\epsilon_r = \epsilon_\infty + \frac{\epsilon_s - \epsilon_\infty}{1 + j2\pi f\tau} \# (S1)$$

$$\epsilon' = \epsilon_\infty + \frac{\epsilon_s - \epsilon_\infty}{1 + (2\pi f)^2\tau^2} \# (S2)$$

$$\epsilon'' = \frac{2\pi f\tau(\epsilon_s - \epsilon_\infty)}{1 + (2\pi f)^2\tau^2} \# (S3)$$

$$\mu' = 1 + \frac{M}{H}\cos\theta \# (S4)$$

$$\mu'' = 1 + \frac{M}{H}\sin\theta \# (S5)$$

$$\tan\delta_\epsilon = \frac{\epsilon''}{\epsilon'} = \frac{(\epsilon_s - \epsilon_\infty)2\pi f\tau}{\epsilon_s + \epsilon_\infty + (2\pi f)^2\tau^2} \# (S6)$$

Here,  $\epsilon_\infty$  is the optical capacitance,  $\epsilon_s$  stands for the static capacitance, H indicates the intensity of applied magnetic field,  $\tau$  denotes the polarization relaxation time, where M represents magnetization intensity and  $\theta$  denotes the phase lag angle.

**Table S1.** Comparison of the  $S_{\text{BET}}$  of S-3 with other EMA materials.

| Sample                                   | $S_{\text{BET}}$ (cm <sup>2</sup> /g) | Ref.             |
|------------------------------------------|---------------------------------------|------------------|
| SiC/C composites                         | 20.9                                  | 2                |
| FeCo/CMT                                 | 221.4                                 | 4                |
| Fe <sub>3</sub> O <sub>4</sub> /Fe/C/rGO | 162.6                                 | 5                |
| STC-600                                  | 53.9                                  | 6                |
| SiC/G-2                                  | 147.3                                 | 7                |
| FGA-9-1.5                                | 110                                   | 8                |
| Fe <sub>3</sub> C/Fe/C-800               | 241.7                                 | 9                |
| CoNC/HPC-1                               | 199.9                                 | 10               |
| Co10/CNF                                 | 46.2                                  | 11               |
| BPC/Co/CNTs                              | 144.2                                 | 12               |
| S-3                                      | 535.1                                 | <b>This work</b> |

**Table S2.** Comparison of the performance of different types of EMA materials.

| Sample                                                       | RL <sub>min</sub> (dB) | EAB <sub>max</sub> (GHz) | Ref.             |
|--------------------------------------------------------------|------------------------|--------------------------|------------------|
| CNWs/SiC/SiOC                                                | -24.5                  | 4.8                      | 13               |
| Ni <sub>x</sub> Co <sub>1</sub> S NWs                        | -30                    | 6.16                     | 14               |
| SiC NWs/SiC                                                  | -33.2                  | 4.2                      | 15               |
| SiC NWs                                                      | -37.92                 | 4.59                     | 16               |
| C <sub>f</sub> /SiC NWs                                      | -41.08                 | 3.68                     | 17               |
| MnO <sub>2</sub> /CF                                         | -42.9                  | 3.84                     | 18               |
| HPCC                                                         | -44.2                  | 4.2                      | 19               |
| Al <sub>4</sub> C <sub>3</sub> @C NWs                        | -47.1                  | 5.5                      | 20               |
| FCNWs                                                        | -47.6                  | 4                        | 21               |
| SiFeBOC                                                      | -47.96                 | 3.52                     | 22               |
| HE carbides NWs                                              | -50                    | 4.67                     | 23               |
| NiS/Ni <sub>3</sub> S <sub>4</sub> @PPy@MoS <sub>2</sub> NWs | -51.29                 | 3.24                     | 24               |
| α-MnO <sub>2</sub> NWs                                       | -55.76                 | 5.6                      | 25               |
| Fe@Ag core-shell NWs                                         | -58.69                 | 7.32                     | 26               |
| Ni@Co <sub>3</sub> O <sub>4</sub> NWs                        | -60                    | 4.62                     | 27               |
| S-3                                                          | -64.6                  | 7.84                     | <b>This work</b> |

## Reference

- 1 Z. Chen, K. Tian, N. Hao, J. Wang, X. Liu, L. Xu and Y. Li, Study on microwave absorption performance of nickel cobalt bimetallic nanosheet arrays @ hydrophilic carbon cloth composite with core-sheath structure, *J. Alloys Compd.*, 2024, **970**, 172594.
- 2 B. Xu, Q. He, Y. Wang and X. Yin, Novel accordion-like structure of SiC/C composites for enhanced electromagnetic wave absorption, *Carbon*, 2023, **215**, 118470.
- 3 X. Yang, L. Xuan, W. Men, X. Wu, D. Lan, Y. Shi, H. Jia and Y. Duan, Carbonyl iron/glass fiber cloth composites: Achieving multi-spectrum stealth in a wide temperature range, *Chem. Eng. J.*, 2024, **491**, 151862.
- 4 Y. Liu, B. Zhang, Y. Yuan, W. Liu, H. Wu, S. Qin, Q. Fang, G. Yu and B. Wang, Kapok derived microtubular FeCo/CMT with high specific surface area for broadband microwave absorption, *Ceram. Int.*, 2024, **50** (6), 9407-9419.
- 5 S. Li, Y. Sun, F. Meng, X. Jiang and H. Yu, Lightweight Fe<sub>3</sub>O<sub>4</sub>/Fe/C/rGO multifunctional aerogel for efficient microwave absorption, electromagnetic interference shielding, hydrophobicity and thermal insulation, *Chem. Eng. J.*, 2024, **498**, 155405.
- 6 S. Li, Y. Sun, X. Jiang and H. Yu, Spongy ternary nano-composites with optimized impedance matching and synergistic effect for broadband and strong microwave absorption, *J. Colloid Interface Sci.*, 2023, **652**, 1197-1207.
- 7 L. Song, Y. Chen, Q. Gao, Z. Li, X. Zhang, H. Wang, L. Guan, Z. Yu, R. Zhang and B. Fan, Low Weight, low thermal Conductivity, and highly efficient electromagnetic wave absorption of Three-Dimensional Graphene/SiC-nanosheets aerogel, *Compos. Part. A-Appl. Sci. Manufa.*, 2022, **158**, 106980.
- 8 G. Qin, Y. Liu, Y. Yan, Z. Cheng, G. Ma, K. Zhang and X. Huang, Combined experiment and simulation on pore structure of graphene aerogel for microwave absorption and thermal insulation, *Compos. Part. B-Eng.*, 2025, **298**, 112397.
- 9 Y. Chen, R. Qiang, Y. Shao, X. Yang, Q. Ma, R. Xue, B. Chen, S. Feng, F. Ren, Y. Ding, L. Sun, Z. Guo, Z. Ma, Z. Liu and X. Chen, Fe<sub>3</sub>C/Fe implanted hierarchical porous carbon foams for lightweight and broadband microwave absorption, *Diamond Relat. Mater.*, 2024, **142**, 110738.
- 10 C. Zhang, K. Luo, J. Liu, H. Zhang, C. Xu, R. Zhang, Y. Cheng, J. Zhang, L. Wu and R. Che, Realizing optimized interfacial polarization and impedance matching with CNT-confined Co nanoparticles in hollow carbon microspheres for enhanced microwave absorption, *J. Mater. Sci. Technol.*, 2024, **175**, 1-9.
- 11 S. Shi, P. Mou, D. Wang, X. Li, S. Teng, M. Zhou, X. Yu, Z. Deng, G. Wan and G. Wang, Co/carbon nanofiber with adjustable size and content of Co nanoparticles for tunable microwave absorption and thermal conductivity, *J. Materiomics*, 2024, **10** (1), 124-133.
- 12 Q. Yi, C. Li, F. Zhang, H. Zhang, X. Wang, H. Shi and M. Piao, Carbon Nanotube Grown from Cobalt Supported on Biomass-Derived Carbon as Nanocomposite for the Attenuation of Electromagnetic Waves, *ACS Appl. Nano Mater.*, 2024, **7** (20), 23763-23776.
- 13 X. Liu, J. Xue, F. Ren, F. Ye, X. Fan, Y. Liu and L. Cheng, Enhanced microwave-absorption properties of polymer-derived SiC/SiOC composite ceramics modified by carbon nanowires, *Ceram. Int.*, 2020, **46** (13), 20742-20750.
- 14 D. Wang, Y. Hu, Z. Cui, P. Yang, Z. Du, Y. Hou, P. Yang, J. Rao, C. Wang and Y. Zhang, Sulfur vacancy regulation and multipolarization of Ni<sub>x</sub>Co<sub>1</sub>S nanowires-decorated biotemplated structures to promote microwave absorption, *J. Colloid Interface Sci.*, 2023, **646**, 991-1001.
- 15 P. Feng, H. Wei, P. Shang, Y. Shi, X. Wei, S. Luo, X. Liang, W. Zhang, Y. Yu and W. He, Enhanced electromagnetic microwave absorption of SiC nanowire-reinforced PDC-SiC ceramics catalysed by rare earth, *Ceram. Int.*, 2022, **48** (17), 24915-24924.
- 16 J. Deng, H. Liu, Q. a. Cui, X. Zhang, L. Han, Q. He, Y. Wang, X. Yin and H. Li, Bioinspired highly oriented SiC nanowire arrays for microwave absorption and thermal insulation, *Carbon*, 2025, **244**, 120630.
- 17 J. Su, B. Wang, X. Cao, R. Yang, H. Zhao, P. Zhang, W. Wang and C. Wang, Simultaneously enhancing mechanical

- and microwave absorption properties of Cf/SiC composites via SiC nanowires additions, *Ceram. Int.*, 2022, **48** (24), 36238-36248.
- 18 Q. Xia, L. Chen, X. Wang, Z. Huang, C. Li, X. Wang, Z. Sun, X. Huang and Q. Chen, The microwave absorption performance of CF coated with MnO<sub>2</sub> nanowires grown by simple hydrothermal method, *Ceram. Int.*, 2024, **50** (24, Part C), 55931-55939.
- 19 D. Liu, K. Gui, M. Wang, M. Zhu, J. Niu and Y. Bao, A novel hierarchical structure comprised of biomass-derived porous carbon and silicon carbide nanowires for highly efficient microwave absorption, *Ceram. Int.*, 2022, **48** (11), 16033-16041.
- 20 A. Hua, Y. Li, D. Pan, J. Luan, Y. Wang, J. He, S. Tang, D. Geng, S. Ma, W. Liu and Z. Zhang, Enhanced wideband microwave absorption of hollow carbon nanowires derived from a template of Al<sub>4</sub>C<sub>3</sub>@C nanowires, *Carbon*, 2020, **161**, 252-258.
- 21 P.-a. Yang, W. Deng, H. Ruan, Z. Qu, R. Li, L. Wang, J. Luo, Z. Zhou, M. Shou, X. Huang, Q. Chen and X. Gong, Amorphous/Graphitic carbon phase engineering of Corrosion-Resistant Fe@C Core-Shell nanowires for optimized dipole polarization and enhanced microwave absorption, *Chem. Eng. J.*, 2024, **492**, 152253.
- 22 J. Li, L. Pan, Q. Zhang, X. Lyu, X. Wang, J. Qi, Z. Wang and G. Zhao, Electromagnetic synergistic enhancement of SiFeBOC ceramics prepared by the polymer-derived ceramic method by Fe<sub>3</sub>Si and SiO<sub>2</sub> nanowires for tunable microwave absorption, *Ceram. Int.*, 2025, **51** (24, Part B), 42126-42138.
- 23 Y. Zhu, L. Guan, C. Duan, J. Zhang, Z. Yan, L. Wen, Z. Wang, X. Sun, Y. Yao, X. Guo, R. Zhang and B. Zhao, High-entropy transition metal carbide nanowires with enhanced microwave absorption properties, *J. Mater. Sci. Technol.*, 2025, **224**, 302-311.
- 24 W. Huang, Z. Tong, Y. Bi, M. Ma, Z. Liao, G. Wu, Y. Ma, S. Guo, X. Jiang and X. Liu, Synthesis and microwave absorption properties of coraloid core-shell structure NiS/Ni<sub>3</sub>S<sub>4</sub>@PPy@MoS<sub>2</sub> nanowires, *J. Colloid Interface Sci.*, 2021, **599**, 262-270.
- 25 D. Xu, M. Zhang, C. Wang, Z. Shen, Y. Zeng, D. Chen, X. Xiong, B. Zhao, X. Guo and P. Chen, Shape-controlled synthesis of MnO<sub>2</sub> nanowires and their ultra-wide microwave absorption properties, *Ceram. Int.*, 2025, **51** (26, Part B), 49127-49134.
- 26 P.-A. Yang, Y. Huang, R. Li, X. Huang, H. Ruan, M. Shou, W. Li, Y. Zhang, N. Li and L. Dong, Optimization of Fe@Ag core-shell nanowires with improved impedance matching and microwave absorption properties, *Chem. Eng. J.*, 2022, **430**, 132878.
- 27 Z. Tong, Y. Bi, M. Ma, Z. Liao, W. Huang, K. L. Chung, Y. Ma, G. Wu, Y. Qu, C. Pan and Y. Wang, Fabrication of flower-like surface Ni@Co<sub>3</sub>O<sub>4</sub> nanowires anchored on RGO nanosheets for high-performance microwave absorption, *Appl. Surf. Sci.*, 2021, **565**, 150483.
